# Supplementary material for: A novel quantitative31P NMR spectroscopic analysis of hydroxyl groups in lignosulfonic acids
Source: Royal Society of Chemistry journal article supplement (doi:10.1039/c8ay01272e), 2018-01-01
Supplement: c8ay01272e1.pdf [file c8ay01272e1.pdf]

## A novel quantitative $^{31}\text{P}$ NMR spectroscopic analysis of hydroxyl groups in lignosulfonic acids

Alexander Stücker,<sup>a</sup> Jacob Podschun,<sup>b</sup> Bodo Saake<sup>b</sup> and Ralph Lehnen<sup>a</sup>

<sup>a</sup>Thünen Institute of Wood Research, Haidkrugsweg 1, 22885 Barsbüttel, Germany.

<sup>b</sup>Department of Wood Science and Chemical Wood Technology, University of Hamburg, Haidkrugsweg 1, 22885 Barsbüttel.

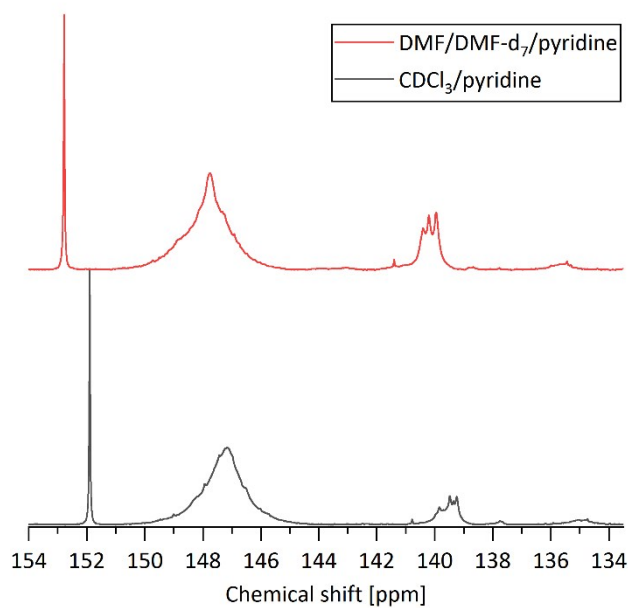

Figure S1: Comparison of  $^{31}\text{P}$  NMR spectra of LS 1 after pre-dialysis using different solvent systems.
